# Supplementary material for: Association between occupational exposures to pesticides with heterogeneous chemical structures and farmer health in China
Source: PubMed Central journal article supplement (PMC4846826; doi:10.1038/srep25190), 2016-04-27
Supplement: srep25190-s1.pdf [file srep25190-s1.pdf]

## **Supplemental Material**

### **Association between occupational exposures to pesticides with heterogeneous chemical structures and farmer health in China**

#### **Authors:**

Xusheng Huang, Chao Zhang, Ruifa Hu, Yifan Li, Yanhong Yin, Zhaohui Chen, Jinyang Cai, and Fang Cui

#### **Table of Contents**

**Table S1.** Definition and description of health parameters.

**Table S2.** Classification of five groups of pesticides.

**Table S1. Definition and description of health parameters.**

| Health parameter                  | Definition            | Unit        | First examination  |              | Second examination |               |
|-----------------------------------|-----------------------|-------------|--------------------|--------------|--------------------|---------------|
|                                   |                       |             | Mean $\pm$ SD      | Range        | Mean $\pm$ SD      | Range         |
| <i>Complete blood cell counts</i> |                       |             |                    |              |                    |               |
| WBC                               | White blood cell      | $10^9/L$    | 6.17 $\pm$ 1.92    | (3.4, 24.3)  | 6.30 $\pm$ 1.83    | (2.47, 14.44) |
| Neu                               | Neutrophil            | $10^9/L$    | 3.62 $\pm$ 1.04    | (1.2, 6.8)   | 3.73 $\pm$ 1.30    | (1.3, 10)     |
| Neup                              | Neutrophil percentage | %           | 59.05 $\pm$ 8.05   | (19.3, 79.2) | 58.75 $\pm$ 8.08   | (40.1, 82.3)  |
| Lym                               | Lymphocyte            | $10^9/L$    | 2.10 $\pm$ 1.31    | (0.8, 18.8)  | 2.02 $\pm$ 0.81    | (0.79, 8.44)  |
| Lymp                              | Lymphocyte percentage | %           | 33.48 $\pm$ 7.76   | (13.2, 77.4) | 32.49 $\pm$ 8.12   | (7.1, 58.4)   |
| Mon                               | Monocyte              | $10^9/L$    | 0.45 $\pm$ 0.17    | (0.15, 1.3)  | 0.17 $\pm$ 0.12    | (0, 0.67)     |
| Monp                              | Monocyte percentage   | %           | 7.46 $\pm$ 2.33    | (3, 19)      | 2.52 $\pm$ 1.47    | (0.1, 7)      |
| RBC                               | Red blood cell        | $10^{12}/L$ | 4.79 $\pm$ 0.55    | (3.16, 7.05) | 4.44 $\pm$ 0.54    | (2.95, 6.17)  |
| Hb                                | Hemoglobin            | g/L         | 145.31 $\pm$ 15.21 | (68, 179)    | 140.24 $\pm$ 16.06 | (83, 176)     |
| Hct                               | Hematocrit            | %           | 43.06 $\pm$ 4.94   | (0.4, 51.6)  | 41.72 $\pm$ 4.41   | (27.9, 53.6)  |

|                                     |                                                      |                     |              |                |              |                |
|-------------------------------------|------------------------------------------------------|---------------------|--------------|----------------|--------------|----------------|
| MCV                                 | Mean corpuscular volume                              | fL                  | 90.65±5.83   | (67, 109)      | 94.33±7.17   | (68.4, 109.6)  |
| MCH                                 | Mean corpuscular hemoglobin                          | pg                  | 30.52±2.55   | (18, 38)       | 31.70±2.68   | (19.3, 39.3)   |
| MCHC                                | Mean corpuscular hemoglobin concentration            | g/L                 | 335.81±13.26 | (240, 372)     | 336.08±15.19 | (274, 401)     |
| RDW_CV                              | Red cell distribution width coefficient of variation | %                   | 12.70±0.95   | (11.2, 19)     | 12.44±1.16   | (10.1, 20)     |
| PLT                                 | Platelet count                                       | 10 <sup>9</sup> /L  | 208.58±59.22 | (16, 328)      | 212.66±72.63 | (27, 448)      |
| MPV                                 | Mean volume of platelets                             | fL                  | 11.0±1.12    | (8.8, 13.6)    | 10.19±1.61   | (7.7, 15.3)    |
| PDW                                 | Platelet distribution width                          | fL                  | 14.01±1.95   | (9.9, 20.7)    | 15.99±0.39   | (15, 18)       |
| <b><i>Blood chemistry panel</i></b> |                                                      |                     |              |                |              |                |
| <b>Hepatic function</b>             |                                                      |                     |              |                |              |                |
| ALT                                 | Alanine aminotransferase                             | U/L                 | 24.54±13.45  | (4.00, 106.00) | 20.18±11.79  | (4.00, 122.00) |
| AST                                 | Aspartate aminotransferase                           | U/L                 | 26.36±8.91   | (13.00, 72.00) | 23.01±12.08  | (12.00, 172.0) |
| ChE                                 | Cholinesterase                                       | 10 <sup>3</sup> U/L | 8.09±1.66    | (3.24, 12.31)  | 8.71±1.73    | (4.65, 13.53)  |

|                       |                      |        |              |                |              |                |
|-----------------------|----------------------|--------|--------------|----------------|--------------|----------------|
| TP                    | Total protein        | g/L    | 69.36±3.90   | (62.00, 79.00) | 76.81±4.84   | (63.70, 92.80) |
| <b>Renal function</b> |                      |        |              |                |              |                |
| BUN                   | Blood urea nitrogen  | mmol/L | 5.52±1.42    | (3.00, 11.26)  | 5.15±1.31    | (1.90, 11.40)  |
| Cr                    | Creatinine           | μmol/L | 75.52±18.07  | (44.0, 122.0)  | 72.99±14.05  | (44.0, 124.0)  |
| <b>Electrolytes</b>   |                      |        |              |                |              |                |
| Na                    | Serum sodium         | mmol/L | 140.71±2.37  | (136.2, 144.9) | 141.97±2.49  | (134.0, 151.0) |
| K                     | Serum potassium      | mmol/L | 4.45±0.46    | (3.60, 5.20)   | 4.68±0.67    | (3.68, 9.20)   |
| P                     | Inorganic phosphorus | mmol/L | 1.31±0.28    | (0.88, 2.20)   | 1.18±0.15    | (0.77, 1.62)   |
| <b>Vitamins</b>       |                      |        |              |                |              |                |
| VB <sub>12</sub>      | Vitamin B12          | ng/L   | 480.94±218.3 | (109.7, 945.7) | 494.9±248.44 | (142, 1550)    |
| VB <sub>9</sub>       | Folic acid           | μg/L   | 10.52±4.04   | (3.25, 19.17)  | 8.29±4.42    | (2.97, 22.00)  |
| <b>Other</b>          |                      |        |              |                |              |                |
| GLU                   | Glucose              | mmol/L | 4.86±1.00    | (3.90, 14.08)  | 5.46±1.02    | (4.16, 12.48)  |
| CRP                   | C-reactive protein   | mg/L   | 1.29±5.01    | (0.00, 52.00)  | 1.62±3.63    | (0.01, 37.20)  |

---

*Nerve conduction*

**Velocity**

|       |                                                 |     |            |                |            |                |
|-------|-------------------------------------------------|-----|------------|----------------|------------|----------------|
| MNMCV | Median nerve motor conduction velocity          | m/s | 59.76±4.46 | (43.50, 73.30) | 58.70±4.25 | (41.70, 68.60) |
| UNMCV | Ulnar nerve motor conduction velocity           | m/s | 58.00±4.49 | (46.40, 73.70) | 57.18±4.11 | (46.40, 68.40) |
| TNMCV | Tibial nerve motor conduction velocity          | m/s | 47.68±3.94 | (35.90, 60.00) | 47.68±3.85 | (38.80, 63.70) |
| PNMCV | Common peroneal nerve motor conduction velocity | m/s | 48.59±4.47 | (27.00, 60.00) | 48.49±4.32 | (25.80, 57.10) |
| MNSCV | Median nerve sensory conduction velocity        | m/s | 58.04±6.11 | (33.30, 69.60) | 58.51±6.33 | (32.60, 72.70) |
| UNSCV | Ulnar nerve sensory conduction velocity         | m/s | 54.33±4.53 | (37.00, 65.70) | 54.17±5.40 | (20.00, 68.00) |
| SNSCV | Sural nerve sensory conduction velocity         | m/s | 59.58±4.98 | (50.00, 75.00) | 60.44±5.64 | (50.00, 71.40) |

**Distal motor latency**

|       |                                   |    |           |              |           |              |
|-------|-----------------------------------|----|-----------|--------------|-----------|--------------|
| MNDML | Median nerve distal motor latency | ms | 3.34±0.52 | (2.10, 7.20) | 3.45±0.67 | (2.60, 8.70) |
| UNDML | Ulnar nerve distal motor latency  | ms | 2.63±0.28 | (2.00, 3.60) | 2.86±0.65 | (2.00, 8.90) |
| TNDML | Tibial nerve distal motor latency | ms | 3.67±0.46 | (2.70, 4.80) | 3.69±0.47 | (2.70, 5.00) |

---

|                  |                                                                  |    |            |               |            |               |
|------------------|------------------------------------------------------------------|----|------------|---------------|------------|---------------|
| PNDML            | Common peroneal nerve distal motor latency                       | ms | 3.73±0.63  | (2.50, 6.70)  | 3.72±0.81  | (2.70, 11.80) |
| <b>Amplitude</b> |                                                                  |    |            |               |            |               |
| MNPCMAPA         | Median nerve proximal compound muscle action potential amplitude | mV | 12.20±3.23 | (5.60, 20.90) | 13.68±3.99 | (5.70, 27.40) |
| MNDCMAPA         | Median nerve distal compound muscle action potential amplitude   | mV | 12.97±3.40 | (5.60, 23.00) | 14.13±4.11 | (6.00, 28.80) |
| UNPCMAPA         | Ulnar nerve proximal compound muscle action potential amplitude  | mV | 11.33±2.29 | (5.20, 18.90) | 12.44±2.79 | (1.00, 21.10) |
| UNDCMAPA         | Ulnar nerve distal compound muscle action potential amplitude    | mV | 12.17±2.27 | (6.10, 20.00) | 13.07±2.71 | (5.40, 23.00) |
| TNPCMAPA         | Tibial nerve proximal compound muscle action potential amplitude | mV | 11.21±3.86 | (3.50, 25.00) | 11.21±3.84 | (3.10, 21.40) |
| TNDCMAPA         | Tibial nerve distal compound muscle action potential amplitude   | mV | 14.31±4.74 | (4.20, 26.70) | 13.54±4.49 | (4.30, 27.70) |

---

|          |                                            |          |       |          |           |           |               |               |               |               |
|----------|--------------------------------------------|----------|-------|----------|-----------|-----------|---------------|---------------|---------------|---------------|
|          | potential amplitude                        |          |       |          |           |           |               |               |               |               |
| PNPCMAPA | Common                                     | peroneal | nerve | proximal | mV        | 6.50±3.12 | (0.10, 20.20) | 6.79±3.27     | (0.10, 19.80) |               |
|          | compound muscle action potential amplitude |          |       |          |           |           |               |               |               |               |
| PNDCMAPA | Common                                     | peroneal | nerve | distal   | compound  | mV        | 7.17±3.32     | (0.10, 19.10) | 7.37±3.34     | (0.10, 18.50) |
|          | muscle action potential amplitude          |          |       |          |           |           |               |               |               |               |
| MNSNAPA  | Median                                     | sensory  | nerve | action   | potential | mV        | 7.67±3.17     | (1.20, 21.00) | 8.41±3.35     | (2.00, 21.00) |
|          | amplitude                                  |          |       |          |           |           |               |               |               |               |
| UNSNAPA  | Ulnar                                      | sensory  | nerve | action   | potential | mV        | 5.84±2.49     | (1.00, 17.00) | 6.29±2.65     | (0.70, 18.00) |
|          | amplitude                                  |          |       |          |           |           |               |               |               |               |
| SNSNAPA  | Sural                                      | sensory  | nerve | action   | potential | mV        | 15.24±6.91    | (4.20, 44.00) | 16.22±7.60    | (4.70, 69.00) |
|          | amplitude                                  |          |       |          |           |           |               |               |               |               |

---

**Table S2. Classification of five groups of pesticides.**

| Group name              | Chemical name    |                   |
|-------------------------|------------------|-------------------|
|                         | Chinese          | English           |
| <b>Organophosphates</b> | 乙酰甲胺磷            | Acephate          |
|                         | 毒死蜱              | Chlorpyrifos      |
|                         | 二嗪磷              | Diazinon          |
|                         | 敌敌畏              | Dichlorvos        |
|                         | 乐果               | Dimethoate        |
|                         | 稻瘟净              | EBP               |
|                         | 三乙磷酸铝            | Fosetyl-aluminium |
|                         | 草甘膦              | Glyphosate        |
|                         | 水胺硫磷             | Isocarbophos      |
|                         | 马拉硫磷             | Malathion         |
|                         | 氧乐果              | Omethoate         |
|                         | 对硫磷              | Parathion         |
|                         | 稻丰散              | Phenthoate        |
|                         | 甲拌磷              | Phorate           |
|                         | 亚胺硫磷             | Phosmet           |
|                         | 辛硫磷              | Phoxim            |
|                         | 丙溴磷              | Profenofos        |
|                         | 特丁硫磷             | Terbufos          |
| 甲基立枯磷                   | Tolclofos-methyl |                   |



---

**Organosulfurs**

|        |                       |
|--------|-----------------------|
| 三唑磷    | Triazophos            |
| 敌百虫    | Trichlorfon           |
| 苄嘧磺隆   | Bensulfuron-methyl    |
| 杀虫双    | Bisultap              |
| 烯草酮    | Clethodim             |
| 二甲基二硫醚 | Dithioether           |
| 乙蒜素    | Ethylsulf             |
| 敌磺钠    | Fenaminosulf          |
| 稻瘟灵    | Isoprothiolane        |
| 代森锰锌   | Mancozeb              |
| 硝磺草酮   | Mesotrione            |
| 代森联    | Metiram               |
| 甲磺隆    | Metsulfuron-methyl    |
| 杀虫单    | Monosultap            |
| 烟嘧磺隆   | Nicosulfuron          |
| 五氟磺草胺  | Penoxsulam            |
| 炔螨特    | Propargite            |
| 丙森锌    | Propineb              |
| 噻菌茂    | Saijunmao             |
| 噻唑锌    | Saizuoxin             |
| 噻吩磺隆   | Thifensulfuron-methyl |
| 甲基硫菌灵  | Thiophanate-methyl    |

---

---

|                        |        |                                |
|------------------------|--------|--------------------------------|
|                        | 福美双    | Thiram                         |
|                        | 苯磺隆    | Tribenuron-methyl              |
|                        | 代森锌    | Zineb                          |
|                        | 福美锌    | Ziram                          |
| <b>Organonitrogens</b> | 啉虫脒    | Acetamiprid                    |
|                        | 乙草胺    | Acetochlor                     |
|                        | 甲草胺    | Alachlor                       |
|                        | 莠去津    | Atrazine                       |
|                        | 噻霉酮    | Benziothiazolinone             |
|                        | 叶枯唑    | Bismethiazol                   |
|                        | 溴菌腈    | Bromothalonil                  |
|                        | 噻嗪酮    | Buprofezin                     |
|                        | 丁草胺    | Butachlor                      |
|                        | 仲丁灵    | Butralin                       |
|                        | 多菌灵    | Carbendazim                    |
|                        | 克百威    | Carbofuron                     |
|                        | 丁硫克百威  | Carbosulfan                    |
|                        | 氯虫苯甲酰胺 | Chlorantraniliprole            |
|                        | 灭幼脲    | Chlorbenzuron                  |
|                        | 氟啉脲    | Chlorfuazuron                  |
|                        | 氯溴异氰尿酸 | Chloroisobromine cyanuric acid |
|                        | 溴氰虫酰胺  | Cyantraniliprole               |

---

---

|         |                      |
|---------|----------------------|
| 氰氟草酯    | Cyhalofop-butyl      |
| 霜脍氰     | Cymoxanil            |
| 灭蝇胺     | Cyromazine           |
| 苯醚甲环唑   | Difenoconazole       |
| 除虫脲     | Diflubenzuron        |
| 烯酰吗啉    | Dimethomorph         |
| 烯唑醇     | Diniconazole         |
| 乙嘧酚     | Ethirimol            |
| 噁唑菌酮    | Famoxadone           |
| 仲丁威     | Fenobucarb           |
| 啉螨酯     | Fenpyronximate       |
| 氟虫腈     | Fipronil             |
| 咯菌腈     | Fludioxonil          |
| 氟吗啉     | Flumorph             |
| 乙羧氟草醚   | Fluoroglycofen-ethyl |
| 氟硅唑     | Flusilazole          |
| 氟虫双酰胺   | Fuchongshuangxianan  |
| 氟酰胺     | Fuchongshuangxianan  |
| 高效氟吡甲禾灵 | Haloxyfop-P-methyl   |
| 噁霉灵     | Hemexazol            |
| 己唑醇     | Hexaconazole         |
| 氟铃脲     | Hexaflumuron         |

---

---

|       |                          |
|-------|--------------------------|
| 噁霉灵   | Hymexazol                |
| 吡虫啉   | Imidacloprid             |
| 茚虫威   | Indoxacarb               |
| 异菌脲   | Iprodione                |
| 啶霉威   | Iprovalicarb             |
| 异丙威   | Isoprocarb               |
| 氰氟虫腙  | Metaflumizone            |
| 甲霜灵   | Metalaxyl                |
| 精甲霜灵  | Metalaxyl-M              |
| 灭多威   | Methomyl                 |
| 异丙甲草胺 | Metolachlor              |
| 速灭威   | Metolcarb                |
| 盐酸吗啉胍 | Moroxydine hydrochloride |
| 腈菌唑   | Myclobutanil             |
| 烟碱    | Nicotine                 |
| 烯啶虫胺  | Nitenpyram               |
| 百草枯   | Paraquat                 |
| 二甲戊灵  | Pendimethalin            |
| 丙草胺   | Pretilachlor             |
| 咪鲜胺   | Prochloraz               |
| 腐霉利   | Procymidone              |
| 扑草净   | Prometryn                |

---

---

|                    |                    |
|--------------------|--------------------|
| 霜霉威                | Propamocarb        |
| 丙环唑                | Propiconazol       |
| 异丙草胺               | Propisochlor       |
| 吡蚜酮                | Pymetrozine        |
| 吡唑醚菌酯              | Pyraclostrobin     |
| 啉螨灵                | Pyridaben          |
| 嘧霉胺                | Pyrimethanil       |
| 精喹禾灵               | Quizalofop-ethyl   |
| 戊唑醇                | Tebuconazole       |
| 虫酰肼                | Tebufenozide       |
| 噻虫嗪                | Thiamethoxam       |
| 三唑酮                | Triadimefon        |
| 肟菌酯                | Trifloxystrobin    |
| 氟乐灵                | Trifluralin        |
| 辛菌胺                | Xinjunan           |
| <b>Pyrethroids</b> |                    |
| 顺式氯氰菊酯             | Alpha-cypermethrin |
| 高效氯氰菊酯             | Beta-cypermethrin  |
| 联苯菊酯               | Bifenthrin         |
| 氯氟氰菊酯              | Cyhalothrin        |
| 氯氰菊酯               | Cypermethrin       |
| 溴氰菊酯               | Deltamethrin       |
| 醚菊酯                | Etofenprox         |

---

---

**Others**

|            |                               |
|------------|-------------------------------|
| 甲氰菊酯       | Fenpropathrin                 |
| 氰戊菊酯       | Fenvalerate                   |
| 高效氯氟氰菊酯    | Lambda-cyhalothrin            |
| 2,4-滴丁酯    | 2,4-D butylate                |
| 阿维菌素       | Abamectin                     |
| 印楝素        | Azadirachtin                  |
| 苏云金杆菌      | <i>Bacillus thuringiensis</i> |
| 白僵菌        | Beauveria                     |
| 毒杀芬        | Camphechlor                   |
| 百菌清        | Chlorothalonil                |
| 四螨嗪        | Clofentezine                  |
| 乙酸铜        | Copper acetate                |
| 氢氧化铜       | Copper hydroxide              |
| 硫酸铜        | Copper sulfate                |
| 甲维盐        | Emamectin benzoate            |
| 硫丹         | Endosulfan                    |
| 丁子香酚       | Eugenol                       |
| 氟邦尼        | Fubangni                      |
| 香菇多糖       | Fungous proteoglycan          |
| 棉铃虫核型多角体病毒 | Heliothis armigera NPV        |
| 井冈霉素       | Jingangmycin                  |
| 春雷霉素       | Kasugamycin                   |

---

---

|             |                             |
|-------------|-----------------------------|
| 苦参碱         | Matrine                     |
| 嘧啶核苷类抗菌素    | Midingheganleikangjunsu     |
| 宁南霉素        | Ningnanmycin                |
| 喹啉铜         | Oxine-copper                |
| 矿物油         | Petroleum oil               |
| 申嗪霉素        | Phenazino-1-carboxylic acid |
| 多抗霉素        | Polyoxin                    |
| 荧光假单胞杆菌     | Pseudomonas fluorescens     |
| 五氯硝基苯       | Quintozene                  |
| 鱼藤酮         | Rotenone                    |
| 松脂酸铜        | Songzhisuantong             |
| 多杀霉素        | Spinosad                    |
| 斜纹夜蛾核型多角体病毒 | Spodopteraliture NPV        |
| 链霉素         | Streptomycin                |
| 硫磺          | Sulfur                      |
| 噻菌铜         | Thiediazole copper          |
| 中生菌素        | Zhongshengmycin             |

---
